# Supplementary material
Source: publisher site journal article supplement (https://www.dovepress.com/article/488964)
Supplement: Supplementary file 1 [file get_supplementary_file.php]

| **Supplementary Table 1.** Multivariate linear regression analysis for the independent associations among PrFT, MHR, and UA. | | | | | | | |
| --- | --- | --- | --- | --- | --- | --- | --- |
| Independent  variables | Dependent  variables | Model 1 | | Model 2 | | Model 3 | |
| *β* | *P* | *β* | *P* | *β* | *P* |
| PrFT | UA | 0.419 | <0.001 | 0.329 | <0.001 | 0.251 | <0.001 |
| MHR | UA | 0.340 | <0.001 | 0.193 | 0.002 | 0.181 | <0.001 |
| MHR | PrFT | 0.355 | <0.001 | 0.176 | <0.001 | 0.164 | <0.001 |
| Model 1: adjusted for age, diabetic duration, smoking, drinking, and hypertension.  Model 2: adjusted for body mass index, waist circumference, glycated hemoglobin A1c, alanine aminotransferase, creatinine, triglyceride, total cholesterol, low-density lipoprotein cholesterol, and homeostasis model assessment insulin resistance.  Model 3: additionally adjusted for visceral fat area and subcutaneous fat area.  MHR: monocyte to high-density lipoprotein cholesterol ratio. PrFT: perirenal fat thickness. UA: uric acid. | | | | | | | |


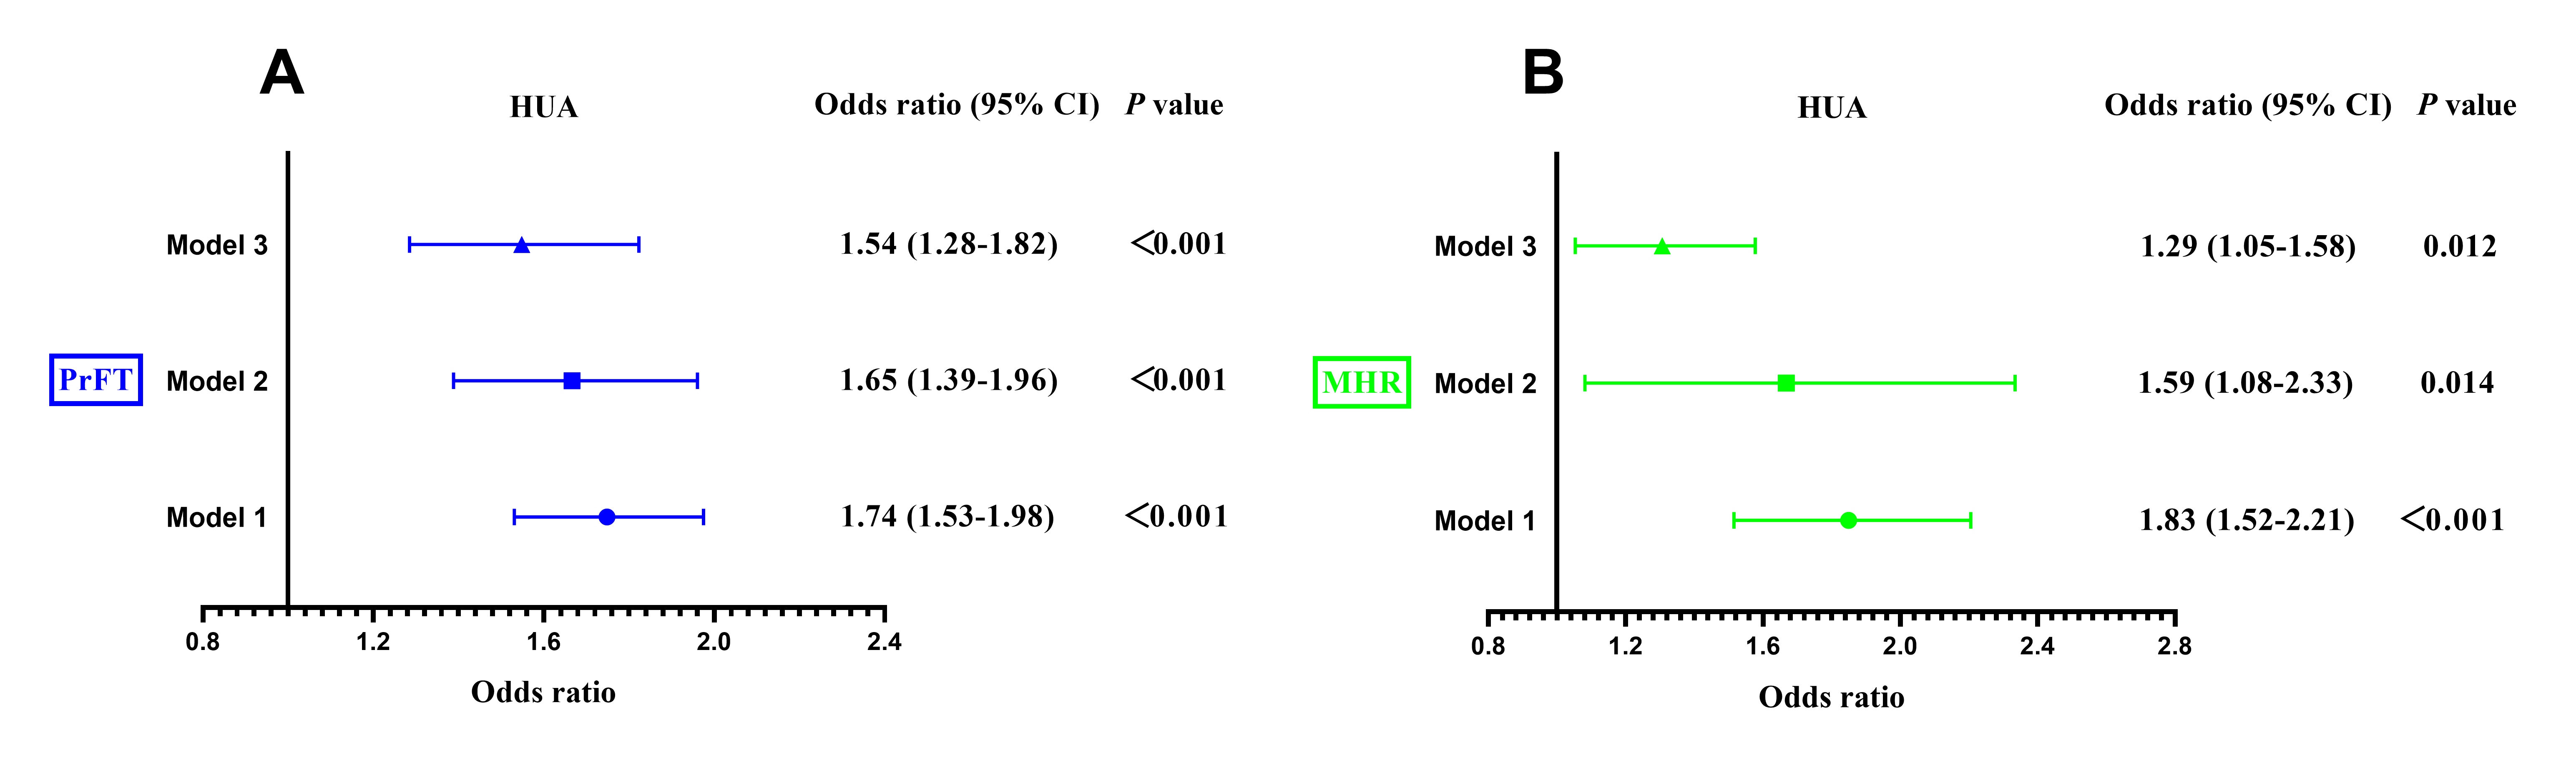


**Supplementary Figure 1:** Weighted binomial logistic regression analysis for the correlation of HUA risk with PrFT (A) and MHR (B) in three models. MHR: monocyte to high-density lipoprotein cholesterol ratio. PrFT: perirenal fat thickness. HUA: hyperuricemia.


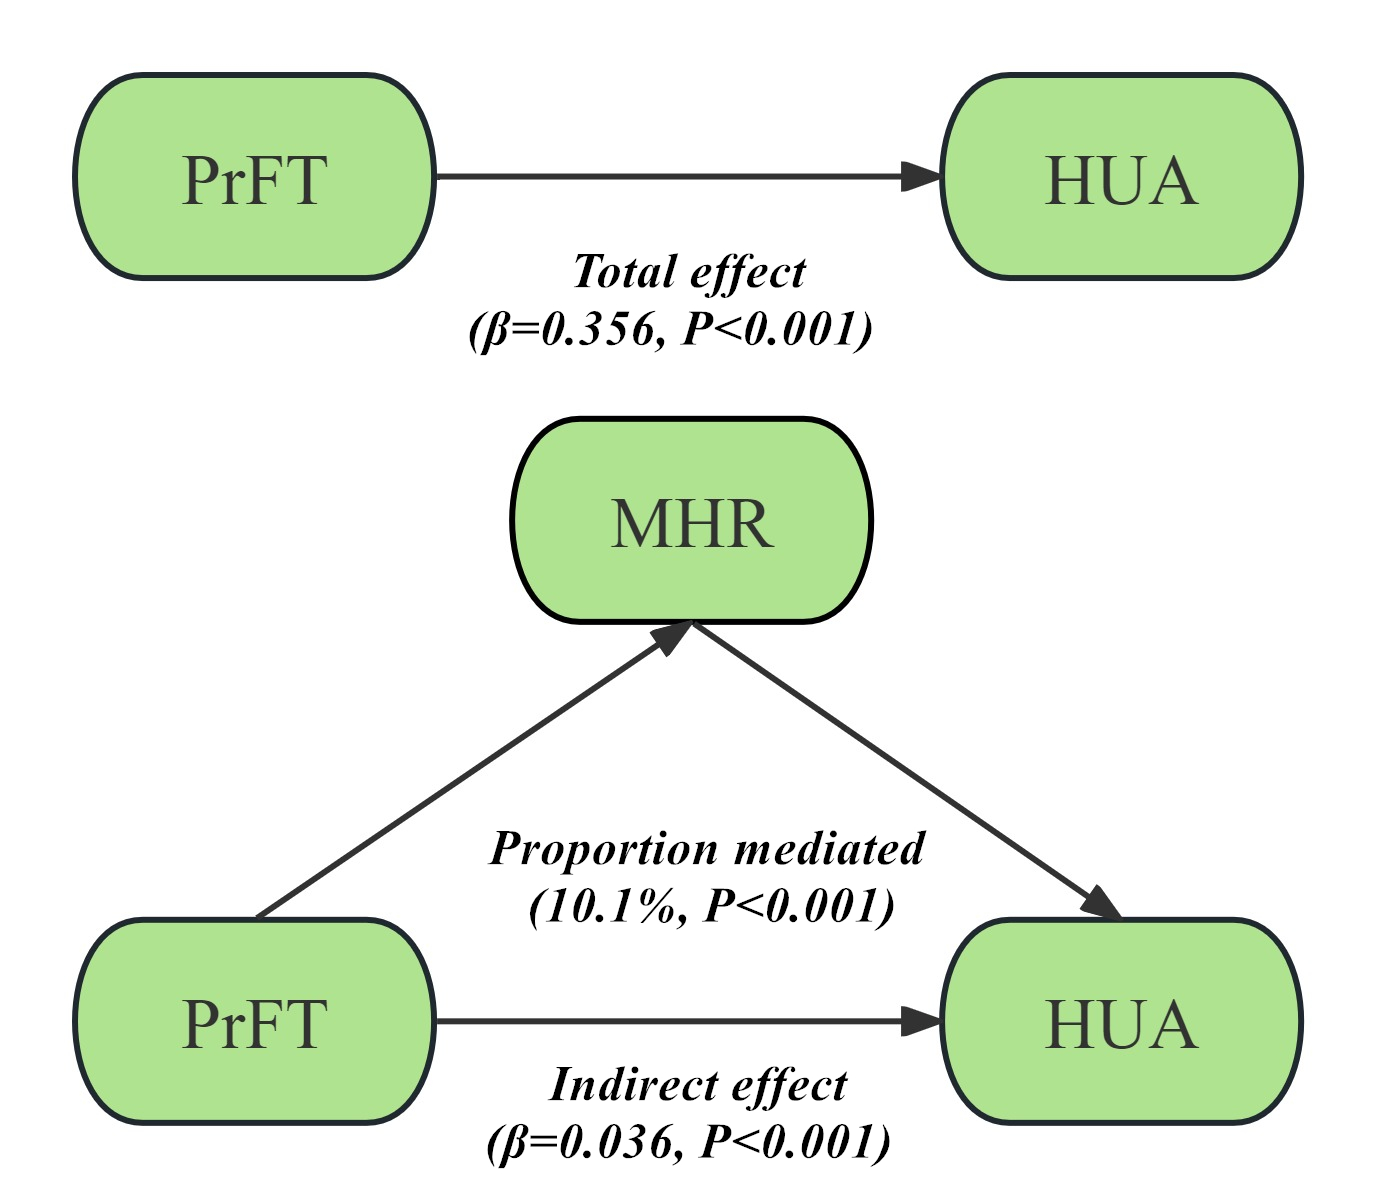


**Supplementary Figure 2:** Structural model for the mediating role of MHR in the association between PrFT and HUA in women after adjusting for Model 3. MHR: monocyte to high-density lipoprotein cholesterol ratio. PrFT: perirenal fat thickness. HUA: hyperuricemia.
